# Supplementary material for: Dual-Component Gelatinous Peptide/Reactive Oligomer Formulations as Conduit Material and Luminal Filler for Peripheral Nerve Regeneration
Source: MDPI journal article supplement (doi:10.3390/ijms18051104), 2017-05-21
Supplement: s1 [file s1]

## Supplementary Materials: Dual-component Gelatinous Peptide/Reactive Oligomer Formulations as Conduit Material and Luminal Filler for Peripheral Nerve Regeneration

Caroline Kohn-Polster, Divya Bhatnagar, Derek Woloszyn, Matthew Richtmyer, Annett Starke, Alexandra H. Springwald, Sandra Franz, Michaela Schulz-Siegmund, Hilton Kaplan, Joachim Kohn, Michael C. Hacker

### (A) Formulation D1

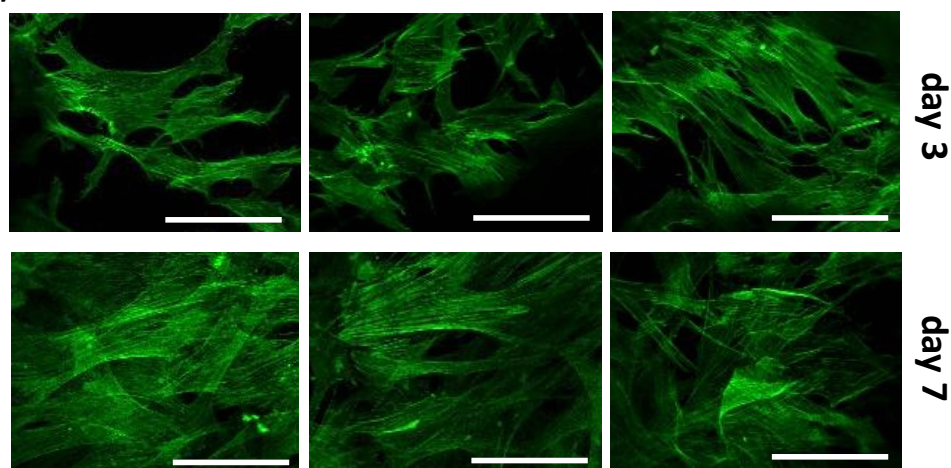

### (B) Formulation D2

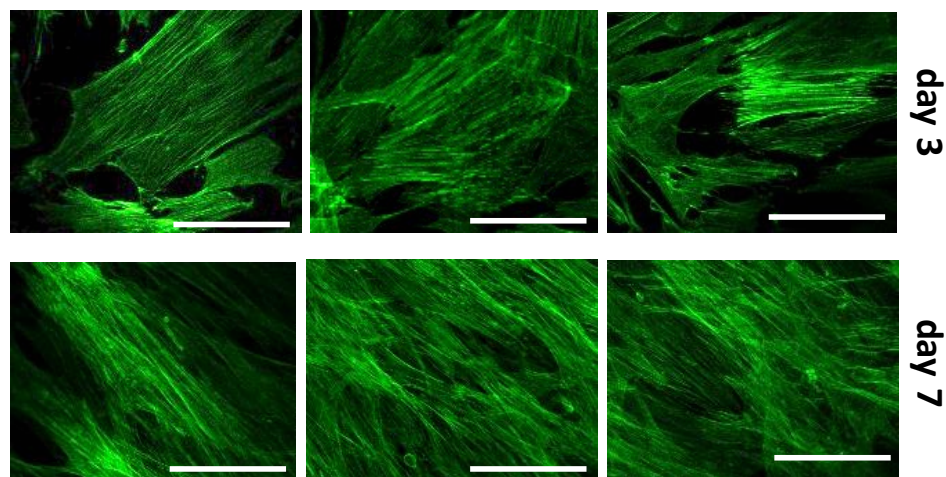

**Figure S1.** Direct cell contact of human adipose tissue-derived stem cells (hASC) on pristine and LM11A-31-derivatized discs of cross-linked hydrogel (cGEL<sub>disc</sub>). Cells with a density of  $10^4$  cells/hydrogel disc were seeded on (A) oPNMA-10 (D1) and (B) oPNMA-10<sup>+LM11A-31</sup> (D2) derived hydrogel discs and stained after Day 3 (top row) and Day 7 (bottom row), the staining was performed with Alexa Fluor® 488 Phalloidin (Invitrogen™) according to the manufacture's protocol; single stacks from laser scanning microscopy micrographs are depicted. Scale bars represent 100  $\mu$ m.
